# Supplementary material
Source: publisher site journal article supplement (https://www.dovepress.com/get_supplementary_file.php?f=352607.docx)
Supplement: Supplementary file 1 [file get_supplementary_file.php]

**SUPPLEMENTARY TABLES**

| **Supplementary Table 1. ANOVA comparing age, gender, and race for psychosocial, QST and CPM assessment outcomes for the patient cohort** | | | | | | | | | |
| --- | --- | --- | --- | --- | --- | --- | --- | --- | --- |
| **ANOVA** | **PCS** | **DN4** | **RCADS** | **PSQI** | **FDI** | **Sensory** | **Affective** | **Evaluative** | **Temporal** |
| **Main effects** |  |  |  |  |  |  |  |  |  |
| Age | 0.542 (0.462) | 4.647 (0.032) | 4.866 (0.028) | 13.556 (< 0.001) | 9.397 (0.002) | 4.852 (0.028) | 0.148 (0.7) | 4.618 (0.033) | 2.989 (0.085) |
| Gender | 4.141 (0.043) | 5.538 (0.019) | 0.503 (0.479) | 0.761 (0.384) | 2.116 (0.147) | 8.241 (0.004) | 7.428 (0.007) | 2.653 (0.104) | 1.814 (0.179) |
| Race | 1.314 (0.253) | 0.536 (0.465) | 0.617 (0.433) | 0.7 (0.403) | 0.031 (0.859) | 0.425 (0.515) | 3.672 (0.056) | 0.182 (0.67) | 0.04 (0.841) |
| **Interactions** |  |  |  |  |  |  |  |  |  |
| Age x Gender | 3.557 (0.06) | 3.369 (0.068) | 1.466 (0.227) | 1.142 (0.286) | 3.078 (0.08) | 1.174 (0.38) | 0.2 (0.655) | 2.403 (0.122) | 0.433 (0.511) |
| Age x Race | 0.163 (0.687) | 1.173 (0.28) | 1.587 (0.209) | 1.316 (0.252) | 0.475 (0.491) | 1.079 (0.3) | 0.549 (0.459) | 0.001 (0.978) | 0.005 (0.941) |
| Gender x Race | 0.023 (0.88) | 3.374 (0.067) | 0.776 (0.376) | 0.516 (0.473) | 0.059 (0.808) | 0.004 (0.947) | 1.434 (0.232) | 0.768 (0.382) | 0.101 (0.751) |
| Age x Gender x Race | 0.865 (0.353) | 0.016 (0.899) | 0.006 (0.937) | 0.742 (0.39) | 0.362 (0.548) | 0.096 (0.756) | 0.007 (0.933) | 0.607 (0.436) | 0.659 (0.418) |
| **Estimated differences** |  |  |  |  |  |  |  |  |  |
| 10-13 vs. 14-18 years | -0.925 | -0.554 | -3.958 | -1.789 | -3.780 | -4.265 | 0.847 | -6.681 | -3.535 |
| Male vs. Female | -3.018 | -0.723 | -1.508 | -0.504 | -2.132 | -6.585 | -7.111 | -5.999 | -3.262 |
| White vs. POC | -1.545 | 0.202 | 1.514 | -0.426 | -0.236 | 1.356 | -4.535 | -1.423 | -0.441 |
| **ANOVA** | **MDTcontrol** | **MDTpain** | **DMAcontrol** | **DMApain** | **VDTcontrol** | **VDTpain** | **WURcontrol** | **WURpain** |  |
| **Main effects** |  |  |  |  |  |  |  |  |  |
| Age | 2.035 (0.155) | 1.302 (0.255) | 0.61 (0.435) | 3.618 (0.058) | 0.071 (0.79) | 4.116 (0.043) | 0.004 (0.948) | 0.231 (0.631) |  |
| Gender | 3.208 (0.074) | 2.565 (0.11) | 1.425 (0.234) | 2.106 (0.148) | 0.663 (0.416) | 0.563 (0.454) | 1.41 (0.236) | 0.553 (0.548) |  |
| Race | 1.689 (0.195) | 0.559 (0.455) | 0.066 (0.797) | 0.199 (0.656) | 0.074 (0.785) | 0.189 (0.664) | 0.882 (0.348) | 0.333 (0.565) |  |
| **Interactions** |  |  |  |  |  |  |  |  |  |
| Age x Gender | 1.798 (0.181) | 1.073 (0.301) | 0.325 (0.251) | 0.199 (0.656) | 0.149 (0.7) | 0.004 (0.95) | 2.67 (0.103) | 0.002 (0.962) |  |
| Age x Race | 0.424 (0.515) | 0.936 (0.334) | 0.52 (0.471) | 4.366 (0.038) | 1.307 (0.254) | 4.652 (0.032) | 1.864 (0.177) | 0.339 (0.561) |  |
| Gender x Race | 0.63 (0.428) | 0.002 (0.96) | 0.176 (0.675) | 1.821 (0.178) | 0.144 (0.704) | 0.038 (0.847) | 8.735 (0.003) | 3.039 (0.082) |  |
| Age x Gender x Race | 0.03 (0.862) | 1.587 (0.209) | 0.011 (0.917) | 0.505 (0.478) | 0.055 (0.816) | 0.899 (0.344) | 0.505 (0.478) | 0.497 (0.482) |  |
| **Estimated differences** |  |  |  |  |  |  |  |  |  |
| 10-13 vs. 14-18 years | 0.220 | 0.256 | 0.115 | 0.495 | 0.033 | 0.347 | 0.008 | 0.066 |  |
| Male vs. Female | -0.327 | -0.4223 | -0.208 | -0.446 | 0.120 | -0.152 | 0.173 | 0.117 |  |
| White vs. POC | -0.215 | -0.179 | 0.041 | 0.124 | 0.037 | 0.080 | -0.125 | 0.084 |  |
| **ANOVA** | **PPTcontrol** | **PPTpain** | **WDTcontrol** | **HPTcontrol** | **CPM** | **TSP** |  |  |  |
| **Main effects** |  |  |  |  |  |  |  |  |  |
| Age | 3.307 (0.07) | 0.01 (0.921) | 2.586 (0.109) | 4.104 (0.044) | 0.073 (0.788) | 1.538 (0.216) |  |  |  |
| Gender | 6.15 (0.014) | 2.384 (0.124) | 6.057 (0.014) | 0.43 (0.513) | 1.816 (0.179) | 3.246 (0.073) |  |  |  |
| Race | 0.547 (0.46) | 0.659 (0.418) | 3.115 (0.079) | 0.317 (0.574) | 0.215 (0.643) | 7.013 (0.009) |  |  |  |
| **Interactions** |  |  |  |  |  |  |  |  |  |
| Age x Gender | 4.63 (0.032) | 1.59 (0.208) | 1.136 (0.288) | 1.879 (0.176) | 0.393 (0.531) | 0.002 (0.966) |  |  |  |
| Age x Race | 0.098 (0.755) | 0.091 (0.763) | 0.078 (0.78) | 2.914 (0.089) | 0.045 (0.832) | 0.168 (0.682) |  |  |  |
| Gender x Race | 1.311 (0.253) | 0.855 (0.356) | 0.011 (0.916) | 2.861 (0.092) | 4.35 (0.038) | 0.099 (0.753) |  |  |  |
| Age x Gender x Race | 0.106 (0.745) | 0.785 (0.376) | 2.334 (0.128) | 5.595 (0.019) | 0.022 (0.882) | 0.843 (0.359) |  |  |  |
| **Estimated differences** |  |  |  |  |  |  |  |  |  |
| 10-13 vs. 14-18 years | -0.109 | 0.009 | 0.140 | -0.693 | 1.544 | 0.362 |  |  |  |
| Male vs. Female | 0.179 | 0.159 | 0.251 | 0.263 | 9.131 | -0.621 |  |  |  |
| White vs. POC | -0.047 | -0.075 | -0.163 | -0.206 | -2.831 | 0.823 |  |  |  |
| The first part of this table comprises of the F test statistic (p-values) derived from the three way ANOVA. The second part of this table displays estimated group differences for the main effects of age, gender and race. The reference group is the first group in each case. The effects refer to log-transformed QST values except VDT and HPT. POC, person of color; control, control area test site; pain, most painful location test site; PCS, pain catastrophizing scale; RCADS; revised child anxiety and depression scale; PSQI, Pittsburgh sleep quality index; MDT, mechanical detection threshold; VDT, vibration detection threshold; DMA, dynamic mechanical allodynia; WUR, wind-up ratio; PPT, pressure pain threshold; WDT, warm detection threshold; HPT, heat pain threshold; CPM; conditioned pain modulation; TSP, temporal summation of pain. | | | | | | | | | |

| **Supplementary Table 2. ANOVA comparing age, gender, and race for psychosocial, QST and CPM assessment outcomes for the age-matched control cohort** | | | | | |
| --- | --- | --- | --- | --- | --- |
| **ANOVA** | **PCS** | **RCADS** | **PSQI** |  |  | |
| **Main effects** |  |  |  |  |  | |
| Age | 1.289 (0.26) | 0.602 (0.441) | 1.379 (0.244) |  |  | |
| Gender | 0.494 (0.485) | 0.94 (0.335) | 0.2 (0.656) |  |  | |
| Race | 1.588 (0.212) | 0 (0.995) | 0.653 (0.422) |  |  | |
| **Interactions** |  |  |  |  |  | |
| Age x Gender | 2.118 (0.15) | 1.636 (0.205) | 0.166 (0.685) |  |  | |
| Age x Race | 0.315 (0.576) | 1.162 (0.285) | 5.475 (0.022) |  |  | |
| Gender x Race | 0.011 (0.919) | 2.231 (0.14) | 7.663 (0.007) |  |  | |
| Age x Gender x Race | 2.097 (0.152) | 0.312 (0.578) | 0.113 (0.737) |  |  | |
| **Estimated differences** |  |  |  |  |  | |
| 10-13 vs. 14-18 years | 2.491 | 2.262 | -0.754 |  |  | |
| Male vs. Female | -1.380 | 2.532 | 0.250 |  |  | |
| White vs. POC | -2.752 | -0.019 | 0.504 |  |  | |
| **ANOVA** | **MDTcontrol** | **DMAcontrol** | **VDTcontrol** | **WURcontrol** |  | |
| **Main effects** |  |  |  |  |  | |
| Age | 3.505 (0.065) | 0.096 (0.578) | 2.843 (0.096) | 0.652 (0.422) |  | |
| Gender | 7.317 (0.009) | 0.676 (0.414) | 8.771 (0.004) | 0.001 (0.97) |  | |
| Race | 1.68 (0.199) | 5.436 (0.023) | 0.295 (0.589) | 1.02 (0.316) |  | |
| **Interactions** |  |  |  |  |  | |
| Age x Gender | 0.195 (0.66) | 0.013 (0.91) | 1.305 (0.257) | 0.873 (0.353) |  | |
| Age x Race | 0.366 (0.547) | 0.109 (0.742) | 0.172 (0.68) | 0.802 (0.373) |  | |
| Gender x Race | 0.714 (0.401) | 2.053 (0.156) | 5.026 (0.028) | 0.285 (0.595) |  | |
| Age x Gender x Race | 0.005 (0.944) | 0.029 (0.866) | 2.95 (0.09) | 0.045 (0.833) |  | |
| **Estimated differences** |  |  |  |  |  | |
| 10-13 vs. 14-18 years | 0.472 | 0.037 | -0.332 | -0.112 |  | |
| Male vs. Female | -0.611 | 0.088 | 0.523 | 0.005 |  | |
| White vs. POC | -0.326 | -0.277 | -0.107 | -0.139 |  | |
| **ANOVA** | **PPTcontrol** | **WDTcontrol** | **HPTcontrol** | **CPM** | **TSP** | |
| **Main effects** |  |  |  |  |  | |
| Age | 25.499 (< 0.001) | 0.041 (0.839) | 0.252 (0.617) | 0.862 (0.356) | 1.514 (0.223) | |
| Gender | 7.064 (0.01) | 11.053 (0.001) | 0.138 (0.711) | 0.229 (0.634) | 0.099 (0.754) | |
| Race | 6.812 (0.011) | 2.42 (0.124) | 0.115 (0.735) | 0.028 (0.867) | 0.816 (0.369) | |
| **Interactions** |  |  |  |  |  | |
| Age x Gender | 0.074 (0.787) | 0.344 (0.559) | 0.932 (0.337) | 0.15 (0.7) | 3.431 (0.068) | |
| Age x Race | 2.117 (0.15) | 0.154 (0.696) | 0.157 (0.693) | 0.925 (0.508) | 0.207 (0.65) | |
| Gender x Race | 1.049 (0.309) | 0.05 (0.825) | 0.142 (0.707) | 0.15 (0.339) | 1.094 (0.229) | |
| Age x Gender x Race | 0.001 (0.979) | 0.153 (0.697) | 0.289 (0.289) | 0.522 (0.472) | 0.365 (0.547) | |
| **Estimated differences** |  |  |  |  |  | |
| 10-13 vs. 14-18 years | -0.564 | 0.032 | -0.338 | -7.967 | 0.631 | |
| Male vs. Female | 0.266 | 0.472 | 0.224 | 3.675 | -0.145 | |
| White vs. POC | 0.290 | -0.246 | -0.228 | 1.431 | -0.461 | |
| The first part of this table comprises of the F test statistic (p-values) derived from the three way ANOVA. The second part of this table displays estimated group differences for the main effects of age, gender and race. The reference group is the first group in each case. The effects refer to log-transformed QST values except VDT and HPT. POC, person of color; control, control area test site; PCS, pain catastrophizing scale; RCADS; revised child anxiety and depression scale; PSQI, Pittsburgh sleep quality index; MDT, mechanical detection threshold; VDT, vibration detection threshold; DMA, dynamic mechanical allodynia; WUR, wind-up ratio; PPT, pressure pain threshold; WDT, warm detection threshold; HPT, heat pain threshold; CPM; conditioned pain modulation; TSP, temporal summation of pain. | | | | | |

| **Supplementary Table 3. Characteristics of psychosocial profiles in adolescents with chronic musculoskeletal pain** | | | | | | |
| --- | --- | --- | --- | --- | --- | --- |
| **Variable** | **Adaptive pain (n = 125)** | **High pain dysfunctional (n = 115)** | **High somatic symptoms (n = 62)** | **Test statistic** | **p-value** | **Subgroup comparison** | |
| **Age, mean ± SD** | 14.52 ± 2.05 | 15.22 ± 1.72 | 15.22 ± 2.03 | 4.81† | 0.009 | HDP > AP | |
| Younger adolescent (10-13 years), n (%) | 47 (37.60) | 24 (20.87) | 16 (25.81) | 8.51* | 0.014 |  | |
| Older adolescent (14-18 years), n (%) | 78 (62.40) | 91 (79.13) | 46 (74.19) |  |  |  | |
| **Gender, n (%)** |  |  |  | 7.15* | 0.028 | ND | |
| Female | 95 (76.00) | 95 (82.61) | 57 (91.94) |  |  |  | |
| Male | 30 (24.00) | 20 (17.39) | 5 (8.06) |  |  |  | |
| **Race, n (%)** |  |  |  | 5.39* | 0.068 | ND | |
| Caucasian (White) | 101 (81.45) | 80 (69.57) | 50 (80.65) |  |  |  | |
| Person of color | 23 (18.55) | 35 (30.43) | 12 (19.35) |  |  |  | |
| **Past hospitalizations, n (%)** |  |  |  | 1.00* | 0.607 | ND | |
| No | 91 (72.80) | 77 (66.96) | 44 (70.97) |  |  |  | |
| Yes | 34 (27.20) | 38 (33.04) | 18 (29.03) |  |  |  | |
| **Past surgeries, n (%)** |  |  |  | 1.30* | 0.523 | ND | |
| No | 80 (64.00) | 67 (58.26) | 35 (56.45) |  |  |  | |
| Yes | 45 (36.00) | 48 (41.74) | 27 (43.55) |  |  |  | |
| **Primary location of pain (Tested pain area), n (%)** |  |  |  | 16.89* | 0.031 | ND | |
| Head/Neck | 4 (3.20) | 6 (5.22) | 1 (1.61) |  |  |  | |
| Upper limbs | 8 (6.40) | 6 (5.22) | 10 (16.13) |  |  |  | |
| Thorax | 3 (2.40) | 0 | 1 (1.61) |  |  |  | |
| Back | 76 (60.80) | 73 (63.48) | 26 (41.94) |  |  |  | |
| Lower limbs | 34 (27.20) | 30 (26.09) | 24 (38.71) |  |  |  | |
| **Presence of radiating pain,  n (%)** | 52 (41.60) | 58 (50.43) | 36 (58.06) | 4.82* | 0.090 | ND | |
| **Presence of secondary pain sites, n (%)** | 59 (47.20) | 63 (54.78) | 36 (58.06) | 2.41* | 0.299 | ND | |
| **Pain now (NRS 0-10),  mean ± SD** | 2.67 ± 2.17 | 3.57 ± 2.42 | 4.29 ± 2.51 | 10.84† | <0.001 | HSS & HPD > AP | |
| **Average pain over the last month (NRS 0-10), mean ± SD** | 5.32 ± 1.93 | 5.89 ± 1.88 | 6.68 ± 1.71 | 11.14† | <0.001 | HSS > HPD & AP | |
| **Worst pain over the last month (NRS 0-10), mean ± SD (n = 301)** | 7.85 ± 1.63 | 8.60 ± 1.49 | 9.08 ± 1.16 | 16.09† | <0.001 | HSS & HPD > AP | |
| **Best pain over the last month (NRS 0-10), mean ± SD  (n = 301)** | 1.47 ± 1.65 | 2.06 ± 1.79 | 2.33 ± 2.21 | 5.52† | 0.004 | HSS & HPD > AP | |
| **Duration of pain, n (%)** |  |  |  | 1.28* | 0.864 | ND | |
| 3 to 6 months | 11 (8.80) | 13 (11.30) | 5 (8.06) |  |  |  | |
| 6 to 12 months | 20 (16.00) | 21 (18.26) | 9 (14.52) |  |  |  | |
| More than 12 months | 94 (75.20) | 81 (70.43) | 48 (42) |  |  |  | |
| **Frequency of pain, n (%)** |  |  |  | 8.98* | 0.062 | ND | |
| Once a day | 87 (69.60) | 90 (78.26) | 55 (88.71) |  |  |  | |
| Every second day | 28 (22.40) | 17 (14.78) | 5 (8.06) |  |  |  | |
| Once a week | 10 (8.00) | 8 (6.96) | 2 (3.23) |  |  |  | |
| **Duration of painful episode,  n (%)** |  |  |  | 16.58* | 0.011 | HSS > AP | |
| Few seconds | 1 (0.80) | 3 (2.61) | 1 (1.61) |  |  |  | |
| Few minutes | 23 (18.40) | 17 (14.78) | 2 (3.23) |  |  |  | |
| Few hours | 39 (31.20) | 24 (20.87) | 12 (19.35) |  |  |  | |
| Constant | 62 (49.60) | 71 (61.74) | 47 (75.81) |  |  |  | |
| **Pain catastrophizing scale, mean ± SD** |  |  |  |  |  |  | |
| Total score | 22.08 ± 8.85 | 31.24 ± 8.23 | 35.96 ± 7.06 | 69.02† | <0.001 | HSS > HPD > AP | |
| Low catastrophizers, n (%) | 29 (23.20) | 1 (0.87) | 0 | 71.00* | <0.001 | HSS > HPD > AP | |
| Moderate catastrophizers,  n (%) | 48 (38.40) | 30 (26.09) | 6 (9.68) |  |  |  | |
| High catastrophizers, n (%) | 48 (38.40) | 82 (71.30) | 56 (90.32) |  |  |  | |
| **Douleur Neuropatique 4 questionnaire** |  |  |  |  |  |  | |
| Total score, mean ± SD | 2.10 ± 1.65 | 3.08 ± 2.07 | 4.44 ± 1.77 | 33.14† | <0.001 | HSS > HPD > AP | |
| Likely neuropathic, n (%) | 22 (17.60) | 47 (40.87) | 44 (70.97) | 50.90* | <0.001 | HSS > AP | |
| **Functional Disability Inventory** |  |  |  |  |  |  | |
| Total score | 8.50 ± 6.43 | 20.00 ± 7.29 | 22.65 ± 9.77 | 100.40† | <0.001 | HSS & HPD > AP | |
| No/minimal disability, n (%) | 89 (71.20) | 17 (14.78) | 13 (20.97) | 120.58* | <0.001 | HSS > HPD > AP | |
| Mild disability, n (%) | 27 (21.60) | 44 (38.26) | 9 (14.52) |  |  |  | |
| Moderate disability, n (%) | 7 (5.60) | 38 (33.04) | 26 (41.94) |  |  |  | |
| Severe disability, n (%) | 0 | 13 (11.30) | 14 (22.58) |  |  |  | |
| **Adolescent Pediatric Pain Tool** |  |  |  |  |  |  | |
| Pain locations, x/67 | 6.26 ± 6.83 | 9.59 ± 7.85 | 12.39 ± 10.50 | 12.83† | <0.001 | HSS & HPD > AP | |
| Sensory descriptors, x/37 % | 15.48 ± 9.20 | 20.80 ± 10.12 | 43.37 ± 15.73 | 133.40† | <0.001 | HSS > HPD > AP | |
| Affective descriptors, x/11 % | 5.75 ± 8.29 | 13.96 ± 11.05 | 38.27 ± 19.83 | 142.40† | <0.001 | HSS > HPD > AP | |
| Evaluative descriptors, x/8 % | 29.50 ± 16.06 | 44.20 ± 19.85 | 71.57 ± 22.20 | 102.70† | <0.001 | HSS > HPD > AP | |
| Temporal descriptors, x/24 % | 24.07 ± 14.66 | 27.76 ± 12.67 | 41.20 ± 17.63 | 29.02† | <0.001 | HSS > HPD & AP | |
| **Revised Child Anxiety and Depression Scale** |  |  |  |  |  |  | |
| Total T-score, mean ± SD | 42.33 ± 9.24 | 59.97 ± 12.35 | 58.42 ± 12.95 | 83.71† | <0.001 | HSS & HPD > AP | |
| Below clinical threshold, n (%) | 124 (99.20) | 76 (66.09) | 44 (70.97) | 44.68* | <0.001 | HSS & HPD > AP | |
| Borderline clinical threshold,  n (%) | 0 | 7 (6.09) | 3 (4.84) |  |  |  | |
| Above clinical threshold, n (%) | 1 (0.80) | 29 (25.22) | 15 (24.19) |  |  |  | |
| **Pittsburgh Sleep Quality Index** |  |  |  |  |  |  | |
| Total score, mean ± SD | 5.32 ± 2.69 | 9.64 ± 3.06 | 9.50 ± 3.96 | 65.64† | <0.001 | HSS & HPD > AP | |
| Good sleep quality, n (%) | 53 (42.40) | 4 (3.48) | 5 (8.06) | 62.99* | <0.001 | HSS & HPD > AP | |
| Poor sleep quality, n (%) | 68 (54.40) | 105 (91.30) | 56 (90.32) |  |  |  | |
| **MDTlog (mN), mean ± SD** |  |  |  |  |  |  | |
| Control area | 0.63 ± 1.25 | 0.82 ± 1.26 | 0.55 ± 1.06 | 1.22† | 0.296 | ND | |
| Tested area | 0.78 ± 1.80 | 0.69 ± 1.74 | 0.39 ± 1.77 | 1.01† | 0.364 | ND | |
| Z-score | 0.14 ± 1.09 | 0.19 ± 1.14 | -0.06 ± 1.01 | 1.06† | 0.347 | ND | |
| **DMAlog (NRS 0-10),  mean ± SD** |  |  |  |  |  |  | |
| Control area | -4.41 ± 0.91 | -4.23 ± 1.24 | -4.05 ± 1.49 | 2.05† | 0.131 | ND | |
| Tested area | -3.77 ± 1.75 | -3.23 ± 2.16 | -2.95 ± 2.37 | 3.96† | 0.020 | HSS > AP | |
| Z-score | 0.36 ± 0.77 | 0.59 ± 0.93 | 0.72 ± 1.00 | 3.94† | 0.020 | HSS > AP | |
| **VDT (x/8), mean ± SD** |  |  |  |  |  |  | |
| Control area | 6.70 ± 0.86 | 6.68 ± 1.02 | 6.84 ± 1.12 | 0.563† | 0.570 | ND | |
| Tested area | 5.79 ± 1.10 | 5.91 ± 1.49 | 6.39 ± 1.47 | 4.35† | 0.014 | HSS > AP | |
| Z-score | -0.68 ± 0.93 | -0.63 ± 1.25 | -0.29 ± 1.31 | 2.56† | 0.079 | ND | |
| **WURlog (ratio), mean ± SD** |  |  |  |  |  |  | |
| Control area | 0.80 ± 1.10 | 0.78 ± 0.96 | 0.61 ± 0.76 | 0.86† | 0.424 | ND | |
| Presence of painful after sensations after 10 stimuli in the control area, n (%) | 35 (28.00) | 44 (38.26) | 34 (54.84) | 13.23* | 0.001 | HSS > AP | |
| Tested area | 0.83 ± 1.20 | 0.52 ± 0.88 | 0.58 ± 0.84 | 2.86† | 0.059 | ND | |
| Presence of painful after sensations after 10 stimuli in the tested area, n (%) | 33 (26.40) | 56 (48.70) | 37 (59.68) | 27.95* | < 0.001 | HSS > AP | |
| Z-score | 0.20 ± 1.39 | 0.05 ± 1.01 | -0.04 ± 0.92 | 0.95† | 0.387 | ND | |
| **PPTlog (kPa), mean ± SD** |  |  |  |  |  |  | |
| Control area | 5.13 ± 0.43 | 5.12 ± 0.49 | 5.05 ± 0.49 | 0.69† | 0.504 | ND | |
| Tested area | 5.18 ± 0.59 | 5.14 ± 0.67 | 4.90 ± 0.71 | 3.69† | 0.026 | HSS < AP | |
| Z-score | -0.15 ± 0.92 | -0.20 ± 1.08 | -0.53 ± 1.10 | 2.78† | 0.064 | ND | |
| **WDTlog (°C from baseline), mean ± SD** |  |  |  |  |  |  | |
| Control area | 0.51 ± 0.68 | 0.39 ± 0.69 | 0.35 ± 0.69 | 1.49† | 0.226 | ND | |
| Z-score | 0.04 ± 1.03 | -0.14 ± 1.05 | -0.21 ± 1.05 | 1.49† | 0.226 | ND | |
| **HPT (°C), mean ± SD** |  |  |  |  |  |  | |
| Control area | 39.56 ± 2.78 | 39.05 ± 2.66 | 39.45 ± 2.74 | 1.07† | 0.346 | ND | |
| Z-score | 0.21 ± 1.07 | 0.01 ± 1.02 | 0.17 ± 1.06 | 1.07† | 0.346 | ND | |
| **CPM efficiency (%),  mean ± SD** | -28.10 ± 42.54 | -19.29 ± 43.47 | -15.21 ± 48.41 | 2.09† | 0.126 | ND | |
| Inefficient, n (%) | 37 (29.60) | 42 (36.52) | 25 (40.32) | 4.12* | 0.390 | ND | |
| Suboptimal, n (%) | 24 (19.20) | 25 (21.74) | 11 (17.74) |  |  |  | |
| Optimal, n (%) | 62 (49.60) | 45 (39.13) | 23 (37.10) |  |  |  | |
| **TSP (NRS -10-+10),  mean ± SD** | 0.32 ± 2.00 | -0.53 ± 2.45 | 0.40 ± 2.31 | 5.31† | 0.005 | HSS & AP > HPD | |
| Absence, n (%) | 103 (82.40) | 98 (85.22) | 48 (77.42) | 2.21* | 0.331 | ND | |
| Presence, n (%) | 20 (16.00) | 13 (11.30) | 12 (19.35) |  |  |  | |
| Percentages do not always add up to 100% due to missing data for some demographic variables.  *Test statistic for chi-square test. †Test statistic for one-way ANOVA.  AP indicates adaptive pain profile; HPD, high pain dysfunctional profile; HSS, high somatic symptoms profile; ND, no statistically significant difference between psychosocial profiles; log, log-transformed data; MDT, mechanical detection threshold; DMA, dynamic mechanical allodynia; VDT, vibration detection threshold; WUR, wind‑up ratio; PPT, pressure pain threshold; WDT, warm detection threshold; HPT, heat pain threshold; CPM indicates conditioned pain modulation; TSP, temporal summation of pain. | | | | | | | |

| **Supplementary Table 4. Characteristics of quantitative sensory testing profiles in adolescents with chronic musculoskeletal pain** | | | | | | | |
| --- | --- | --- | --- | --- | --- | --- | --- |
| **Variable** | **Normative QST (n = 147)** | **Mechanical hyperalgesia (n = 31)** | **Sensory loss (n = 16)** | **Thermal hyperalgesia (n = 108)** | **Test statistic** | **p-value** | **Subgroup comparison** |
| **Age, mean ± SD** | 15.05 ± 1.82 | 14.56 ± 2.24 | 15.59 ± 1.93 | 14.77 ± 2.03 | 1.39† | 0.245 | ND |
| Younger adolescent  (10-13 years), n (%) | 41 (26.45) | 14 (41.18) | 2 (13.33) | 30 (30.61) | 4.86* | 0.182 | ND |
| Older adolescent  (14-18 years), n (%) | 114 (73.55) | 20 (58.82) | 13 (86.67) | 68 (69.39) |  |  |  |
| **Gender, n (%)** |  |  |  |  | 3.91* | 0.271 | ND |
| Female | 127 (81.94) | 24 (70.59) | 12 (80.00) | 84 (85.71) |  |  |  |
| Male | 28 (18.06) | 10 (29.41) | 3 (20.00) | 14 (14.29) |  |  |  |
| **Race, n (%)** |  |  |  |  | 3.00* | 0.392 | ND |
| Caucasian (White) | 123 (79.35) | 28 (82.35) | 11 (73.33) | 69 (71.13) |  |  |  |
| Person of color | 32 (20.65) | 6 (17.65) | 4 (26.67) | 28 (28.87) |  |  |  |
| **Past hospitalizations, n (%)** |  |  |  |  | 10.28* | 0.016 | ND |
| No | 112 (72.26) | 20 (58.82) | 6 (40.00) | 74 (75.51) |  |  |  |
| Yes | 43 (27.74) | 14 (41.18) | 9 (60.00) | 24 (24.49) |  |  |  |
| **Past surgeries, n (%)** |  |  |  |  | 2.72* | 0.436 | ND |
| No | 91 (58.71) | 18 (52.94) | 8 (53.33) | 65 (66.33) |  |  |  |
| Yes | 64 (41.29) | 16 (47.06) | 7 (46.67) | 33 (33.67) |  |  |  |
| **Primary location of pain (Tested pain area), n (%)** |  |  |  |  | 9.69* | 0.644 | ND |
| Head/Neck | 7 (4.52) | 2 (5.88) | 0 | 2 (2.04) |  |  |  |
| Upper limbs | 11 (7.10) | 1 (2.94) | 0 | 12 (12.24) |  |  |  |
| Thorax | 2 (1.29) | 0 | 0 | 2 (2.04) |  |  |  |
| Back | 91 (58.71) | 18 (52.94) | 11 (73.33) | 55 (56.12) |  |  |  |
| Lower limbs | 44 (28.39) | 13 (38.24) | 4 (26.67) | 27 (27.55) |  |  |  |
| **Presence of radiating pain, n (%)** | 72 (44.12) | 15 (44.12) | 8 (53.33) | 51 (52.04) | 1.15* | 0.765 | ND |
| **Presence of secondary pain sites, n (%)** | 80 (51.61) | 21 (61.76) | 6 (40.00) | 51 (52.04) | 2.16* | 0.539 | ND |
| **Pain now (NRS 0-10), mean ± SD** | 3.16 ± 2.43 | 2.94 ± 2.23 | 2.10 ± 1.80 | 3.96 ± 2.42 | 4.18† | 0.006 | TH > SL |
| **Average pain over the last month (NRS 0‑10), mean ± SD** | 5.69 ± 1.91 | 5.47 ± 1.97 | 6.33 ± 1.71 | 6.05 ± 1.97 | 1.44† | 0.231 | ND |
| **Worst pain over the last month (NRS 0-10), mean ± SD (n = 301)** | 8.41 ± 1.52 | 8.16 ± 1.67 | 8.20 ± 1.39 | 8.45 ± 1.62 | 0.38† | 0.771 | ND |
| **Best pain over the last month (NRS 0-10), mean ± SD  (n = 301)** | 1.68 ± 1.65 | 2.00 ± 1.99 | 0.67 ± 1.11 | 2.31 ± 2.09 | 4.71† | 0.003 | TH > SL |
| **Duration of pain,  n (%)** |  |  |  |  | 7.33* | 0.292 | ND |
| 3 to 6 months | 15 (9.68) | 2 (5.88) | 0 | 12 (12.24) |  |  |  |
| 6 to 12 months | 26 (16.77) | 2 (5.88) | 4 (26.67) | 18 (18.37) |  |  |  |
| More than 12 months | 114 (73.55) | 30 (88.24) | 11 (73.33) | 68 (69.39) |  |  |  |
| **Frequency of pain,  n (%)** |  |  |  |  | 5.97* | 0.427 | ND |
| Once a day | 119 (76.77) | 25 (73.53) | 9 (60.00) | 79 (80.61) |  |  |  |
| Every second day | 26 (16.77) | 7 (20.59) | 3 (20.00) | 14 (14.29) |  |  |  |
| Once a week | 10 (6.45) | 2 (5.88) | 3 (20.00) | 5 (5.10) |  |  |  |
| **Duration of painful episode, n (%)** |  |  |  |  | 11.98* | 0.215 | ND |
| Few seconds | 1 (0.65) | 0 | 0 | 4 (4.08) |  |  |  |
| Few minutes | 22 (14.19) | 6 (17.65) | 2 (13.33) | 12 (12.24) |  |  |  |
| Few hours | 32 (20.65) | 9 (26.47) | 7 (46.67) | 27 (27.55) |  |  |  |
| Constant | 100 (64.52) | 19 (55.88) | 6 (40.00) | 55 (56.12) |  |  |  |
| **Pain catastrophizing scale** |  |  |  |  |  |  |  |
| Total score, mean ± SD | 27.39 ± 10.11 | 27.07 ± 9.75 | 31.43 ± 8.66 | 30.00 ± 9.89 | 2.04† | 0.108 | ND |
| Low catastrophizers,  n (%) | 18 (11.61) | 4 (11.76) | 0 | 8 (8.16) | 4.24* | 0.644 | ND |
| Moderate catastrophizers, n (%) | 47 (30.32) | 9 (26.47) | 4 (26.67) | 24 (24.49) |  |  |  |
| High catastrophizers,  n (%) | 89 (57.42) | 21 (61.76) | 11 (73.33) | 65 (66.33) |  |  |  |
| **Douleur Neuropatique 4 questionnaire** |  |  |  |  |  |  |  |
| Total score, mean ± SD | 2.70 ± 2.06 | 2.40 ± 1.69 | 3.20 ± 2.31 | 3.25 ± 1.94 | 4.27† | 0.006 | TH > N |
| Likely neuropathic,  n (%) | 52 (33.55) | 6 (17.65) | 7 (46.67) | 48 (48.98) | 11.63* | 0.009 | TH > N & MH & SL |
| **Functional Disability Inventory** |  |  |  |  |  |  |  |
| Total score | 15.67 ± 9.30 | 10.58 ± 8.74 | 15.87 ± 8.93 | 17.68 ± 10.38 | 4.41† | 0.005 | TH > MH |
| No/minimal disability,  n (%) | 58 (37.42) | 23 (67.65) | 6 (40.00) | 32 (32.65) | 20.71* | 0.014 | N & SL & TH > MH |
| Mild disability, n (%) | 3 (8.82) | 49 (31.61) | 4 (26.67) | 24 (24.49) |  |  |  |
| Moderate disability,  n (%) | 32 (20.65) | 5 (14.71) | 3 (20.00) | 31 (31.63) |  |  |  |
| Severe disability, n (%) | 14 (9.03) | 1 (2.94) | 2 (13.33) | 10 (10.20) |  |  |  |
| **Adolescent Pediatric Pain Tool** |  |  |  |  |  |  |  |
| Pain locations, x/67 | 9.68 ± 9.38 | 6.79 ± 6.27 | 7.20 ± 5.61 | 8.26 ± 7.59 | 1.52† | 0.209 | ND |
| Sensory descriptors, x/37 % | 24.59 ± 16.66 | 17.77 ± 12.46 | 19.82 ± 10.99 | 23.54 ± 14.33 | 2.07† | 0.104 | ND |
| Affective descriptors, x/11 % | 14.99 ± 18.93 | 9.64 ± 9.63 | 17.58 ± 17.00 | 18.18 ± 16.65 | 2.15† | 0.094 | ND |
| Evaluative descriptors, x/8 % | 46.27 ± 26.51 | 35.61 ± 18.78 | 35.00 ± 18.42 | 43.81 ± 23.11 | 2.43† | 0.066 | ND |
| Temporal descriptors, x/24 % | 30.40 ± 16.64 | 23.97 ± 10.62 | 26.67 ± 10.00 | 28.87 ± 16.86 | 1.61† | 0.187 | ND |
| **Revised Child Anxiety and Depression Scale** |  |  |  |  |  |  |  |
| Total T-score,  mean ± SD | 51.46 ± 13.80 | 51.48 ± 15.07 | 53.13 ± 17.39 | 53.70 ± 13.73 | 0.55† | 0.646 | ND |
| Below clinical threshold, n (%) | 129 (83.23) | 26 (76.47) | 12 (80.00) | 77 (78.57) | 2.58* | 0.860 | ND |
| Borderline clinical threshold, n (%) | 4 (2.58) | 1 (2.94) | 0 | 5 (5.10) |  |  |  |
| Above clinical threshold, n (%) | 21 (13.55) | 6 (17.65) | 3 (20.00) | 15 (15.31) |  |  |  |
| **Pittsburgh Sleep Quality Index** |  |  |  |  |  |  |  |
| Total score, mean ± SD | 7.82 ± 3.83 | 6.62 ± 2.69 | 7.50 ± 3.72 | 8.23 ± 3.92 | 1.44† | 0.232 | ND |
| Good sleep quality,  n (%) | 36 (23.23) | 7 (20.59) | 2 (13.33) | 17 (17.35) | 1.96* | 0.581 | ND |
| Poor sleep quality,  n (%) | 114 (73.55) | 23 (67.65) | 12 (80.00) | 80 (81.63) |  |  |  |
| **MDTlog (mN),  mean ± SD** |  |  |  |  |  |  |  |
| Control area | 0.37 ± 1.20 | 1.11 ± 1.11 | 1.15 ± 1.76 | 0.97 ± 1.05 | 7.75† | <0.001 | MH & TH > N |
| Tested area | 0.16 ± 1.59 | 2.08 ± 1.45 | 1.89 ± 1.98 | 0.78 ± 1.76 | 15.91† | <0.001 | MH & SL & TH > N MH > TH |
| Z-score | 0.24 ± 0.96 | -0.90 ± 1.01 | -0.84 ± 1.49 | -0.29 ± 1.03 | 16.50† | <0.001 | MH & SL & TH < N MH < TH |
| **DMAlog (NRS 0-10), mean ± SD** |  |  |  |  |  |  |  |
| Control area | -4.53 ± 0.54 | -4.32 ± 1.17 | -4.36 ± 0.96 | -3.82 ± 1.71 | 7.76† | <0.001 | TH > N |
| Tested area | -4.29 ± 1.19 | -3.68 ± 1.87 | -4.40 ± 0.79 | -1.74 ± 2.35 | 46.67† | <0.001 | TH > N & MH & SL |
| Z-score | 0.13 ± 0.52 | 0.40 ± 0.85 | 0.20 ± 0.77 | 1.22 ± 0.97 | 44.57† | <0.001 | TH > N & MH & SL |
| **VDT (x/8), mean ± SD** |  |  |  |  |  |  |  |
| Control area | 6.97 ± 0.88 | 6.54 ± 0.78 | 6.08 ± 1.61 | 6.48 ± 0.96 | 8.58† | <0.001 | N > SL & TH |
| Tested area | 6.43 ± 1.23 | 5.35 ± 0.88 | 4.63 ± 1.60 | 5.64 ± 1.34 | 17.69† | <0.001 | N > MH & TH > SL |
| Z-score | -0.19 ± 1.04 | -1.00 ± 0.73 | -1.64 ± 1.68 | -0.89 ± 1.12 | 15.97† | <0.001 | N > MH & SL & TH |
| **WURlog (ratio),  mean ± SD** |  |  |  |  |  |  |  |
| Control area | 0.67 ± 0.78 | 1.14 ± 1.50 | 0.72 ± 1.10 | 0.74 ± 1.01 | 2.13† | 0.096 | ND |
| Presence of painful after sensations after 10 stimuli in the control area, n (%) | 55 (35.48) | 8 (23.53) | 3 (20.00) | 47 (47.96) | 10.2*† | 0.016 | TH > N & MH & SL |
| Tested area | 0.67 ± 1.00 | 0.81 ± 1.60 | 0.88 ± 0.61 | 0.57 ± 0.84 | 0.68† | 0.566 | ND |
| Presence of painful after sensations after 10 stimuli in the tested area, n (%) | 58 (37.42) | 7 (20.59) | 7 (46.67) | 54 (55.10) | 19.84* | <0.001 | TH > N & MH & SL |
| Z-score | 0.01 ± 0.99 | 0.54 ± 1.85 | 0.17 ± 1.14 | 0.07 ± 1.11 | 1.88† | 0.132 | ND |
| **PPTlog (kPa),  mean ± SD** |  |  |  |  |  |  |  |
| Control area | 5.20 ± 0.42 | 5.00 ± 0.39 | 5.41 ± 0.59 | 4.96 ± 0.48 | 8.33† | <0.001 | SL > MH N & SL > TH |
| Tested area | 5.26 ± 0.60 | 5.00 ± 0.79 | 5.46 ± 0.47 | 4.87 ± 0.63 | 9.26† | <0.001 | N & SL > TH |
| Z-score | 0.00 ± 0.93 | 0.46 ± 1.10 | -0.40 ± 0.89 | 0.65 ± 1.01 | 11.09† | <0.001 | SL < MH N & SL < TH |
| **WDTlog (°C from baseline), mean ± SD** |  |  |  |  |  |  |  |
| Control area | 0.31 ± 0.61 | 1.04 ± 1.34 | 1.24 ± 0.46 | 0.29 ± 0.52 | 22.58† | <0.001 | TH & N < MH & SL |
| Z-score | 0.27 ± 0.92 | -0.85 ± 1.45 | -1.15 ± 0.69 | 0.29 ± 0.79 | 22.58† | <0.001 | TH & N > MH & SL |
| **HPT (°C), mean ± SD** |  |  |  |  |  |  |  |
| Control area | 39.30 ± 2.48 | 41.44 ± 1.88 | 43.35 ± 2.19 | 38.09 ± 2.41 | 31.51† | <0.001 | MH & SL > N > TH |
| Z-score | -0.11 ± 0.96 | -0.93 ± 0.72 | -1.67 ± 0.84 | 0.36 ± 0.93 | 31.51† | <0.001 | MH & SL < N < TH |
| **CPM efficiency (%), mean ± SD** | -23.08 ± 42.68 | -28.14 ± 52.39 | -35.10 ± 31.38 | -16.89 ± 45.15 | 1.05† | 0.373 | ND |
| Inefficient, n (%) | 52 (33.55) | 10 (29.41) | 3 (20.00) | 39 (39.80) | 4.25* | 0.643 | ND |
| Suboptimal, n (%) | 31 (20.00) | 6 (17.65) | 2 (13.33) | 21 (21.43) |  |  |  |
| Optimal, n (%) | 69 (44.52) | 17 (50.00) | 8 (53.33) | 36 (36.73) |  |  |  |
| **TSP (NRS -10-+10), mean ± SD** | 0.08 ± 2.29 | 0.56 ± 2.21 | -0.82 ± 2.71 | -0.15 ± 2.19 | 1.42† | 0.236 | ND |
| Absence, n (%) | 127 (81.94) | 25 (73.53) | 12 (80.00) | 85 (86.73) | 3.86* | 0.277 | ND |
| Presence, n (%) | 25 (16.13) | 8 (23.53) | 1 (6.67) | 11 (11.22) |  |  |  |
| Percentages do not always add up to 100% due to missing data for some demographic variables.  *Test statistic for chi-square test. †Test statistic for one-way ANOVA.  QST indicates quantitative sensory testing; log, log-transformed data; MDT, mechanical detection threshold; DMA, dynamic mechanical allodynia; VDT, vibration detection threshold; WUR, wind‑up ratio; PPT, pressure pain threshold; WDT, warm detection threshold; HPT, heat pain threshold; N, normative QST profile; MH, mechanical hyperalgesia profile; SL, sensory loss profile; TH, thermal hyperalgesia profile; ND, no statistically significant difference between somatosensory profiles; CPM indicates conditioned pain modulation; TSP, temporal summation of pain. | | | | | | | |

| **Supplementary Table 5. Characteristics of pain modulation profiles in adolescents with chronic musculoskeletal pain** | | | | | | | |
| --- | --- | --- | --- | --- | --- | --- | --- |
| **Variable** | **Dysfunctional central processing (n = 27)** | **Dysfunctional inhibition (n = 136)** | **Facilitation (n = 18)** | **Functional central processing (n = 112)** | **Test statistic** | **p-value** | **Subgroup comparison** |
| **Age, mean ± SD** | 15.01 ± 1.76 | 14.94 ± 1.99 | 14.87 ± 2.42 | 14.90 ± 1.86 | 0.03† | 0.992 | ND |
| Younger adolescent (10-13 years), n (%) | 6 (22.22) | 39 (28.68) | 6 (33.33) | 33 (29.46) | 0.77* | 0.856 | ND |
| Older adolescent  (14-18 years), n (%) | 21 (77.78) | 97 (71.32) | 12 (66.67) | 79 (70.54) |  |  |  |
| **Gender, n (%)** |  |  |  |  | 2.76* | 0.430 | ND |
| Female | 23 (85.19) | 106 (77.94) | 15 (83.33) | 96 (85.71) |  |  |  |
| Male | 4 (14.81) | 30 (22.06) | 3 (16.67) | 16 (14.29) |  |  |  |
| **Race, n (%)** |  |  |  |  | 1.85* | 0.605 | ND |
| Caucasian (White) | 20 (74.07) | 99 (73.33) | 15 (83.33) | 89 (79.46) |  |  |  |
| Person of color | 7 (25.93) | 36 (26.67) | 3 (16.67) | 23 (20.54) |  |  |  |
| **Past hospitalizations, n (%)** |  |  |  |  | 0.81* | 0.847 | ND |
| No | 18 (66.67) | 94 (69.12) | 14 (77.78) | 80 (71.43) |  |  |  |
| Yes | 9 (33.33) | 42 (30.88) | 4 (22.22) | 32 (28.57) |  |  |  |
| **Past surgeries, n (%)** |  |  |  |  | 1.79* | 0.616 | ND |
| No | 18 (66.67) | 79 (58.09) | 13 (72.22) | 68 (60.71) |  |  |  |
| Yes | 9 (33.33) | 57 (41.91) | 5 (27.78) | 44 (39.29) |  |  |  |
| **Primary location of pain (Tested pain area), n (%)** |  |  |  |  | 7.69* | 0.807 | ND |
| Head/Neck | 1 (3.70) | 7 (5.15) | 0 | 3 (2.68) |  |  |  |
| Upper limbs | 4 (14.81) | 10 (7.35) | 1 (5.56) | 7 (6.25) |  |  |  |
| Thorax | 0 | 1 (0.74) | 0 | 3 (2.68) |  |  |  |
| Back | 13 (48.15) | 76 (55.88) | 12 (66.67) | 68 (60.71) |  |  |  |
| Lower limbs | 9 (33.33) | 42 (30.88) | 5 (27.78) | 31 (27.68) |  |  |  |
| **Presence of radiating pain, n (%)** | 14 (51.85) | 63 (46.32) | 10 (55.56) | 56 (50.00) | 0.83* | 0.843 | ND |
| **Presence of secondary pain sites, n (%)** | 15 (55.56) | 75 (55.15) | 7 (38.89) | 59 (52.68) | 1.76* | 0.624 | ND |
| **Pain now (NRS 0-10), mean ± SD** | 3.80 ± 1.95 | 3.34 ± 2.53 | 3.22 ± 2.01 | 3.27 ± 2.43 | 0.37† | 0.777 | ND |
| **Average pain over the last month (NRS  0-10), mean ± SD** | 6.28 ± 1.89 | 5.81 ± 1.96 | 5.50 ± 1.73 | 5.70 ± 1.91 | 0.80† | 0.495 | ND |
| **Worst pain over the last month (NRS  0-10), mean ± SD  (n = 301)** | 8.50 ± 1.45 | 8.44 ± 1.62 | 7.83 ± 1.64 | 8.41 ± 1.46 | 0.87† | 0.456 | ND |
| **Best pain over the last month (NRS  0-10), mean ± SD  (n = 301)** | 2.31 ± 1.79 | 1.92 ± 1.96 | 1.83 ± 1.78 | 1.70 ± 1.69 | 0.90† | 0.441 | ND |
| **Duration of pain,  n (%)** |  |  |  |  | 2.43* | 0.876 | ND |
| 3 to 6 months | 4 (14.81) | 11 (8.09) | 2 (11.11) | 12 (10.71) |  |  |  |
| 6 to 12 months | 5 (18.52) | 20 (14.71) | 3 (16.67) | 21 (18.75) |  |  |  |
| More than 12 months | 18 (66.67) | 105 (77.21) | 13 (72.22) | 79 (70.54) |  |  |  |
| **Frequency of pain,  n (%)** |  |  |  |  | 1.07* | 0.983 | ND |
| Once a day | 22 (81.48) | 104 (76.47) | 13 (72.22) | 87 (77.68) |  |  |  |
| Every second day | 3 (11.11) | 23 (16.91) | 4 (22.22) | 18 (16.07) |  |  |  |
| Once a week | 2 (7.41) | 9 (6.62) | 1 (5.56) | 7 (6.25) |  |  |  |
| **Duration of painful episode, n (%)** |  |  |  |  | 3.16* | 0.957 | ND |
| Few seconds | 0 | 2 (1.47) | 0 | 3 (2.68) |  |  |  |
| Few minutes | 3 (11.11) | 21 (15.44) | 2 (11.11) | 15 (13.39) |  |  |  |
| Few hours | 8 (29.63) | 33 (24.26) | 3 (16.67) | 27 (24.11) |  |  |  |
| Constant | 16 (59.26) | 80 (58.82) | 13 (72.22) | 67 (59.82) |  |  |  |
| **Pain catastrophizing scale** |  |  |  |  |  |  |  |
| Total score, mean ± SD | 28.70 ± 11.62 | 28.65 ± 9.92 | 28.72 ± 9.60 | 27.67 ± 9.92 | 0.22† | 0.881 | ND |
| Low catastrophizers,  n (%) | 3 (11.11) | 12 (8.82) | 3 (16.67) | 12 (10.71) | 3.86* | 0.696 | ND |
| Moderate catastrophizers, n (%) | 7 (25.93) | 38 (27.94) | 2 (11.11) | 35 (31.25) |  |  |  |
| High catastrophizers,  n (%) | 17 (62.96) | 84 (61.76) | 13 (72.22) | 65 (58.04) |  |  |  |
| **Douleur Neuropatique 4 questionnaire** |  |  |  |  |  |  |  |
| Total score, mean ± SD | 3.80 ± 1.73 | 3.17 ± 2.18 | 2.75 ± 1.83 | 2.56 ± 1.88 | 3.41† | 0.018 | ND |
| Likely neuropathic,  n (%) | 15 (55.56) | 57 (41.91) | 7 (38.89) | 31 (27.68)* | 11.04* | 0.012 | DCP & DI & F > FCP |
| **Functional Disability Inventory** |  |  |  |  |  |  |  |
| Total score | 15.19 ± 9.19 | 17.21 ± 9.93 | 15.00 ± 9.76 | 14.19 ± 9.47 | 2.04† | 0.109 | ND |
| No/minimal disability,  n (%) | 11 (40.74) | 43 (31.62) | 9 (50.00 | 53 (47.32) | 12.09* | 0.208 | ND |
| Mild disability, n (%) | 10 (37.04) | 39 (28.68) | 2 (11.11) | 28 (25.00) |  |  |  |
| Moderate disability,  n (%) | 4 (14.81) | 40 (29.41) | 5 (27.78) | 20 (17.86) |  |  |  |
| Severe disability, n (%) | 2 (7.41) | 12 (8.82) | 2 (11.11) | 9 (8.04) |  |  |  |
| **Adolescent Pediatric Pain Tool** |  |  |  |  |  |  |  |
| Pain locations, x/67 | 8.89 ± 7.68 | 8.90 ± 9.28 | 7.78 ± 6.94 | 8.83 ± 7.47 | 0.10† | 0.961 | ND |
| Sensory descriptors, x/37 % | 26.93 ± 14.56 | 23.07 ± 15.51 | 23.27 ± 21.62 | 22.71 ± 14.61 | 0.56† | 0.645 | ND |
| Affective descriptors, x/11 % | 17.85 ± 17.56 | 16.08 ± 17.90 | 19.19 ± 23.72 | 13.56 ± 15.48 | 0.95† | 0.417 | ND |
| Evaluative descriptors, x/8 % | 46.30 ± 27.04 | 44.31 ± 23.83 | 36.11 ± 31.47 | 43.97 ± 23.07 | 0.71† | 0.545 | ND |
| Temporal descriptors, x/24 % | 31.31 ± 17.89 | 27.07 ± 14.21 | 32.32 ± 21.20 | 30.6 ± 15.46 | 1.45† | 0.230 | ND |
| **Revised Child Anxiety and Depression Scale** |  |  |  |  |  |  |  |
| Total T-score,  mean ± SD | 50.63 ± 10.99 | 53.40 ± 14.91 | 54.28 ± 15.88 | 51.17 ± 13.79 | 0.74† | 0.529 | ND |
| Below clinical threshold, n (%) | 25 (92.59) | 107 (78.68) | 12 (66.67) | 92 (82.14) | 8.32* | 0.216 | ND |
| Borderline clinical threshold, n (%) | 1 (3.70) | 6 (4.41) | 0 | 3 (2.68) |  |  |  |
| Above clinical threshold, n (%) | 1 (3.70) | 21 (15.44) | 6 (33.33) | 17 (15.18) |  |  |  |
| **Pittsburgh Sleep Quality Index** |  |  |  |  |  |  |  |
| Total score, mean ± SD | 8.50 ± 4.11 | 7.98 ± 3.77 | 6.88 ± 3.62 | 7.52 ± 3.68 | 0.93† | 0.425 | ND |
| Good sleep quality,  n (%) | 5 (18.52) | 29 (21.32) | 5 (27.78) | 22 (19.64) | 0.84* | 0.840 | ND |
| Poor sleep quality,  n (%) | 21 (77.78) | 103 (75.74) | 12 (66.67) | 87 (77.68) |  |  |  |
| **MDTlog (mN),  mean ± SD** |  |  |  |  |  |  |  |
| Control area | 0.87 ± 0.93 | 0.64 ± 1.15 | 0.46 ± 1.17 | 0.72 ± 1.38 | 0.48† | 0.694 | ND |
| Tested area | 0.72 ± 1.66 | 0.55 ± 1.77 | 1.47 ± 1.53 | 0.69 ± 1.79 | 1.46† | 0.226 | ND |
| Z-score | 0.23 ± 0.91 | 0.05 ± 1.04 | 0.34 ± 1.08 | 0.14 ± 1.19 | 0.54† | 0.656 | ND |
| **DMAlog (NRS 0-10), mean ± SD** |  |  |  |  |  |  |  |
| Control area | -4.45 ± 0.79 | -4.18 ± 1.28 | -4.61 ± 1.10 | -4.34 ± 1.08 | 1.12† | 0.341 | ND |
| Tested area | -2.99 ± 2.26 | -3.23 ± 2.21 | -3.74 ± 1.69 | -3.71 ± 1.83 | 1.65† | 0.179 | ND |
| Z-score | 0.59 ± 0.84 | 0.60 ± 0.97 | 0.33 ± 0.64 | 0.40 ± 0.78 | 1.33† | 0.264 | ND |
| **VDT (x/8), mean ± SD** |  |  |  |  |  |  |  |
| Control area | 6.50 ± 0.89 | 6.76 ± 0.97 | 6.81 ± 0.87 | 6.72 ± 0.92 | 0.62† | 0.601 | ND |
| Tested area | 5.73 ± 1.59 | 6.02 ± 1.37 | 6.07 ± 1.24 | 5.96 ± 1.21 | 0.39† | 0.760 | ND |
| Z-score | -0.83 ± 1.25 | -0.52 ± 1.16 | -0.47 ± 1.08 | -0.58 ± 1.02 | 0.60† | 0.618 | ND |
| **WURlog (ratio),  mean ± SD** |  |  |  |  |  |  |  |
| Control area | 0.79 ± 1.00 | 0.71 ± 0.91 | 0.99 ± 0.89 | 0.75 ± 1.06 | 0.46† | 0.711 | ND |
| Presence of painful after sensations after 10 stimuli in the control area, n (%) | 16 (59.26) | 50 (36.76) | 5 (27.78) | 38 (33.93) | 6.57* | 0.087 | ND |
| Tested area | 0.41 ± 0.55 | 0.55 ± 0.85 | 0.52 ± 0.52 | 0.86 ± 1.29 | 2.48† | 0.062 | ND |
| Presence of painful after sensations after 10 stimuli in the tested area, n (%) | 14 (51.85) | 56 (41.18) | 7 (38.89) | 44 (39.29) | 1.70* | 0.637 | ND |
| Z-score | 0.03 ± 1.00 | 0.02 ± 1.11 | 0.26 ± 0.87 | 0.17 ± 1.32 | 0.46† | 0.711 | ND |
| **PPTlog (kPa),  mean ± SD** |  |  |  |  |  |  |  |
| Control area | 5.13 ± 0.49 | 5.10 ± 0.51 | 5.23 ± 0.38 | 5.09 ± 0.41 | 0.49† | 0.691 | ND |
| Tested area | 4.92 ± 0.70 | 5.13 ± 0.73 | 5.12 ± 0.44 | 5.14 ± 0.57 | 0.83† | 0.480 | ND |
| Z-score | -0.43 ± 1.14 | -0.23 ± 1.16 | -0.12 ± 0.63 | -0.24 ± 0.89 | 0.35† | 0.787 | ND |
| **WDTlog (°C from baseline), mean ± SD** |  |  |  |  |  |  |  |
| Control area | 0.31 ± 0.65 | 0.42 ± 0.76 | 0.68 ± 0.50 | 0.41 ± 0.61 | 1.15† | 0.331 | ND |
| Z-score | -0.27 ± 0.98 | -0.10 ± 1.15 | 0.30 ± 0.76 | -0.11 ± 0.93 | 1.15† | 0.331 | ND |
| **HPT (°C), mean ± SD** |  |  |  |  |  |  |  |
| Control area | 39.14 ± 1.98 | 39.13 ± 2.72 | 40.45 ± 2.17 | 39.39 ± 2.90 | 1.34† | 0.262 | ND |
| Z-score | 0.05 ± 0.76 | 0.04 ± 1.05 | 0.55 ± 0.84 | 0.14 ± 1.12 | 1.34† | 0.262 | ND |
| **CPM efficiency (%), mean ± SD** | 13.29 ± 30.55 | 6.60 ± 35.02 | -58.53 ± 21.30 | -59.86 ± 20.67 | 177.3† | <0.001 | DCP & DI > F & FCP |
| Inefficient, n (%) | 22 (81.48) | 82 (60.29) | 0 | 0 | 300.87* | <0.001 | DCP & DI > F & FCP |
| Suboptimal, n (%) | 5 (18.52) | 54 (39.71) | 0 | 0 |  |  | DCP & DI > F & FCP |
| Optimal, n (%) | 0 | 0 | 18 (100) | 112 (100) |  |  | DCP & DI < F & FCP |
| **TSP (NRS -10-+10), mean ± SD** | 3.31 ± 1.2 | -0.57 ± 1.95 | 3.47 ± 1.38 | -0.63 ± 1.73 | 63.07† | <0.001 | DCP & F > DI & FCP |
| Absence, n (%) | 0 | 136 (100) | 0 | 112 (100) | 293* | <0.001 | DCP & F < DI & FCP |
| Presence, n (%) | 27 (100) | 0 | 18 (100) | 0 |  |  | DCP & F > DI & FCP |
| Percentages do not always add up to 100% due to missing data for some demographic variables.  *Test statistic for chi-square test. †Test statistic for one-way ANOVA.  log, log-transformed data; MDT, mechanical detection threshold; DMA, dynamic mechanical allodynia; VDT, vibration detection threshold; WUR, wind‑up ratio; PPT, pressure pain threshold; WDT, warm detection threshold; HPT, heat pain threshold; CPM indicates conditioned pain modulation; TSP, temporal summation of pain; DCP, dysfunctional central processing; DI, dysfunctional inhibition; F, facilitation; FCP, functional central processing; ND, no statistically significant difference between pain modulation response profiles. | | | | | | | |
